# Supplementary figures and images for: Efficacy and safety of tofacitinib versus baricitinib in patients with rheumatoid arthritis in real clinical practice: analyses with propensity score-based inverse probability of treatment weighting
Source: HighWire-hosted journal article supplement (doi:10.1136/annrheumdis-2020-219699), 2021-04-07

Supplementary Figure S4.

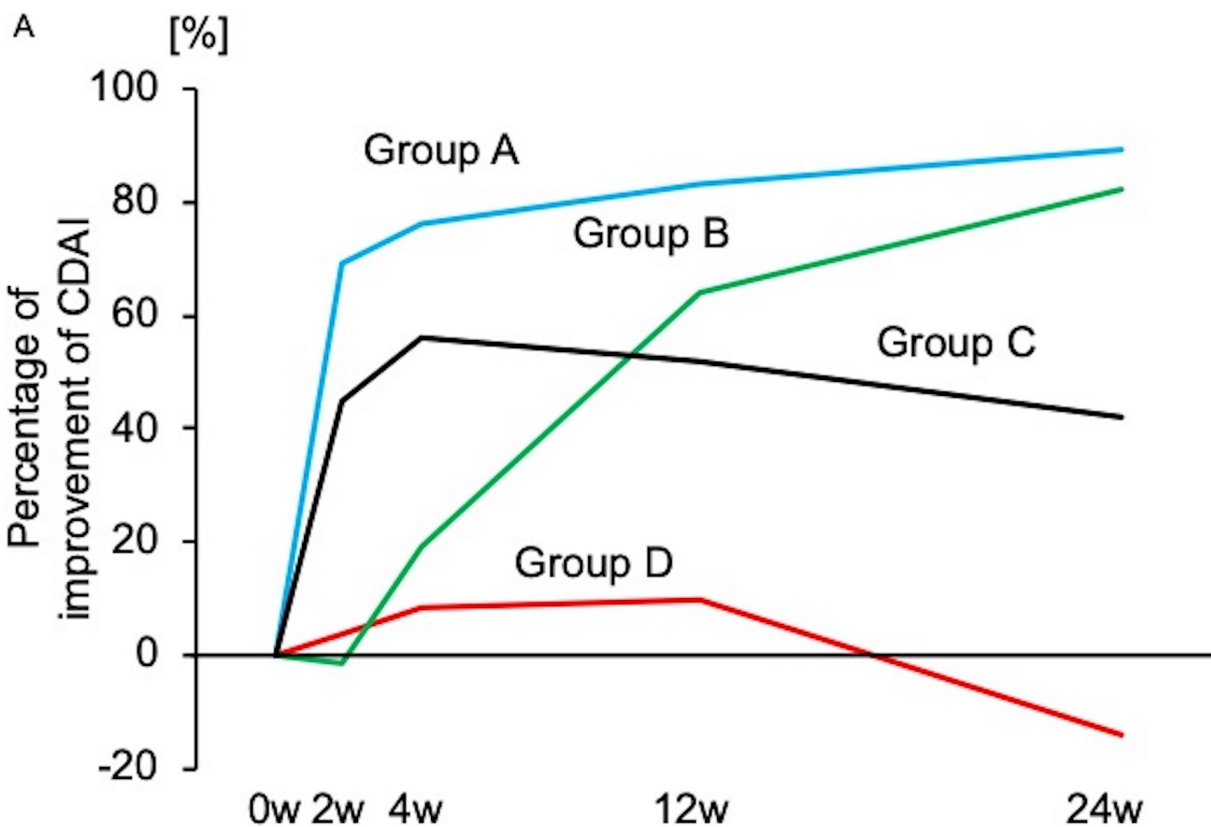

**B**

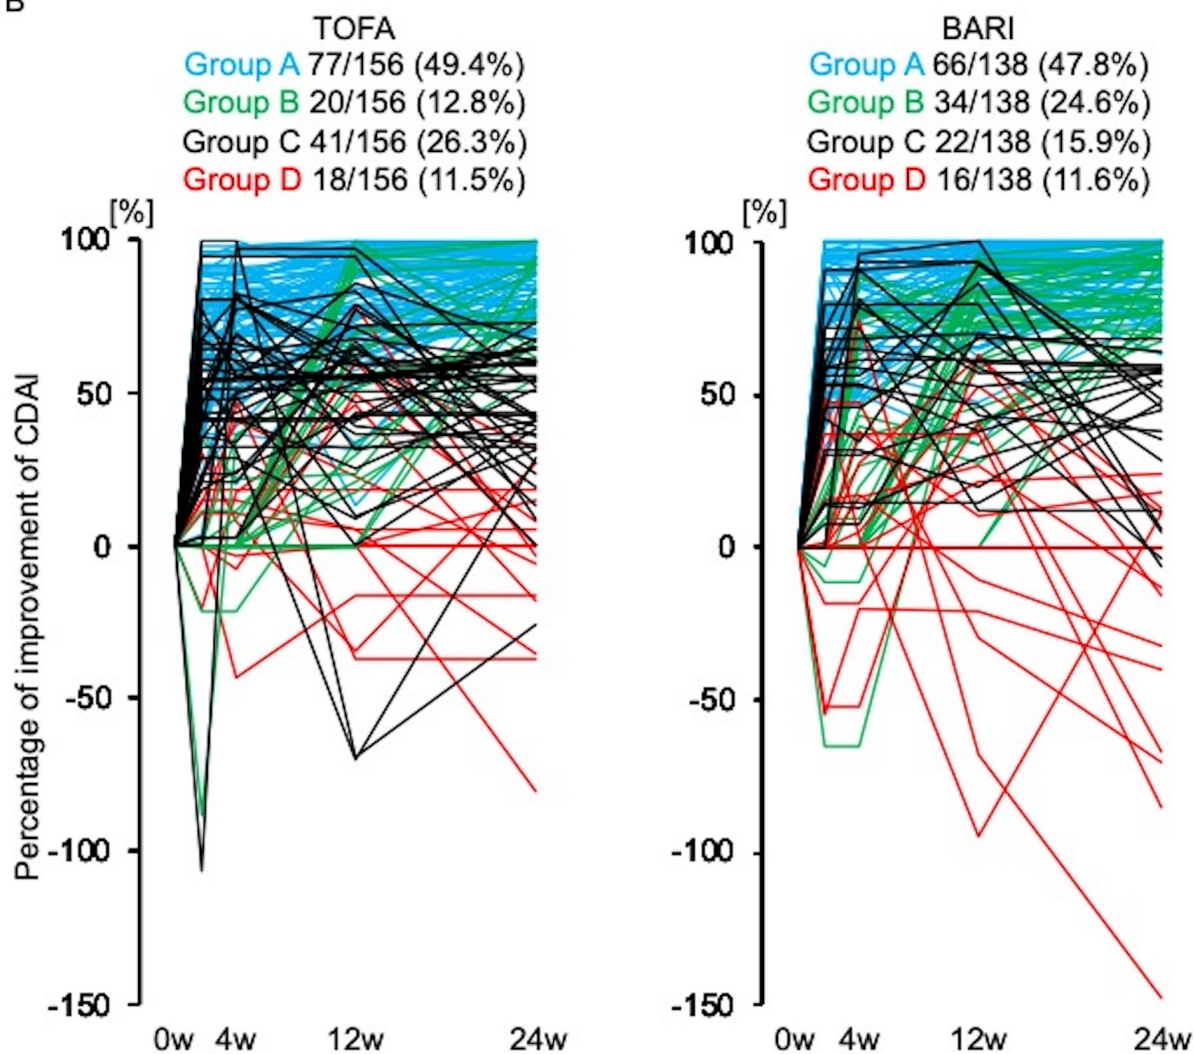

Supplement: annrheumdis-2020-219699supp005_data_supplement.pdf [file annrheumdis-2020-219699supp005_data_supplement.pdf]
